# Supplementary figures and images for: Phylogeny of the Vitamin K 2,3-Epoxide Reductase (VKOR) Family and Evolutionary Relationship to the Disulfide Bond Formation Protein B (DsbB) Family
Source: MDPI journal article supplement (doi:10.3390/nu7085281), 2015-07-29

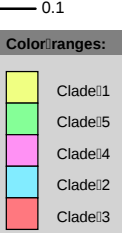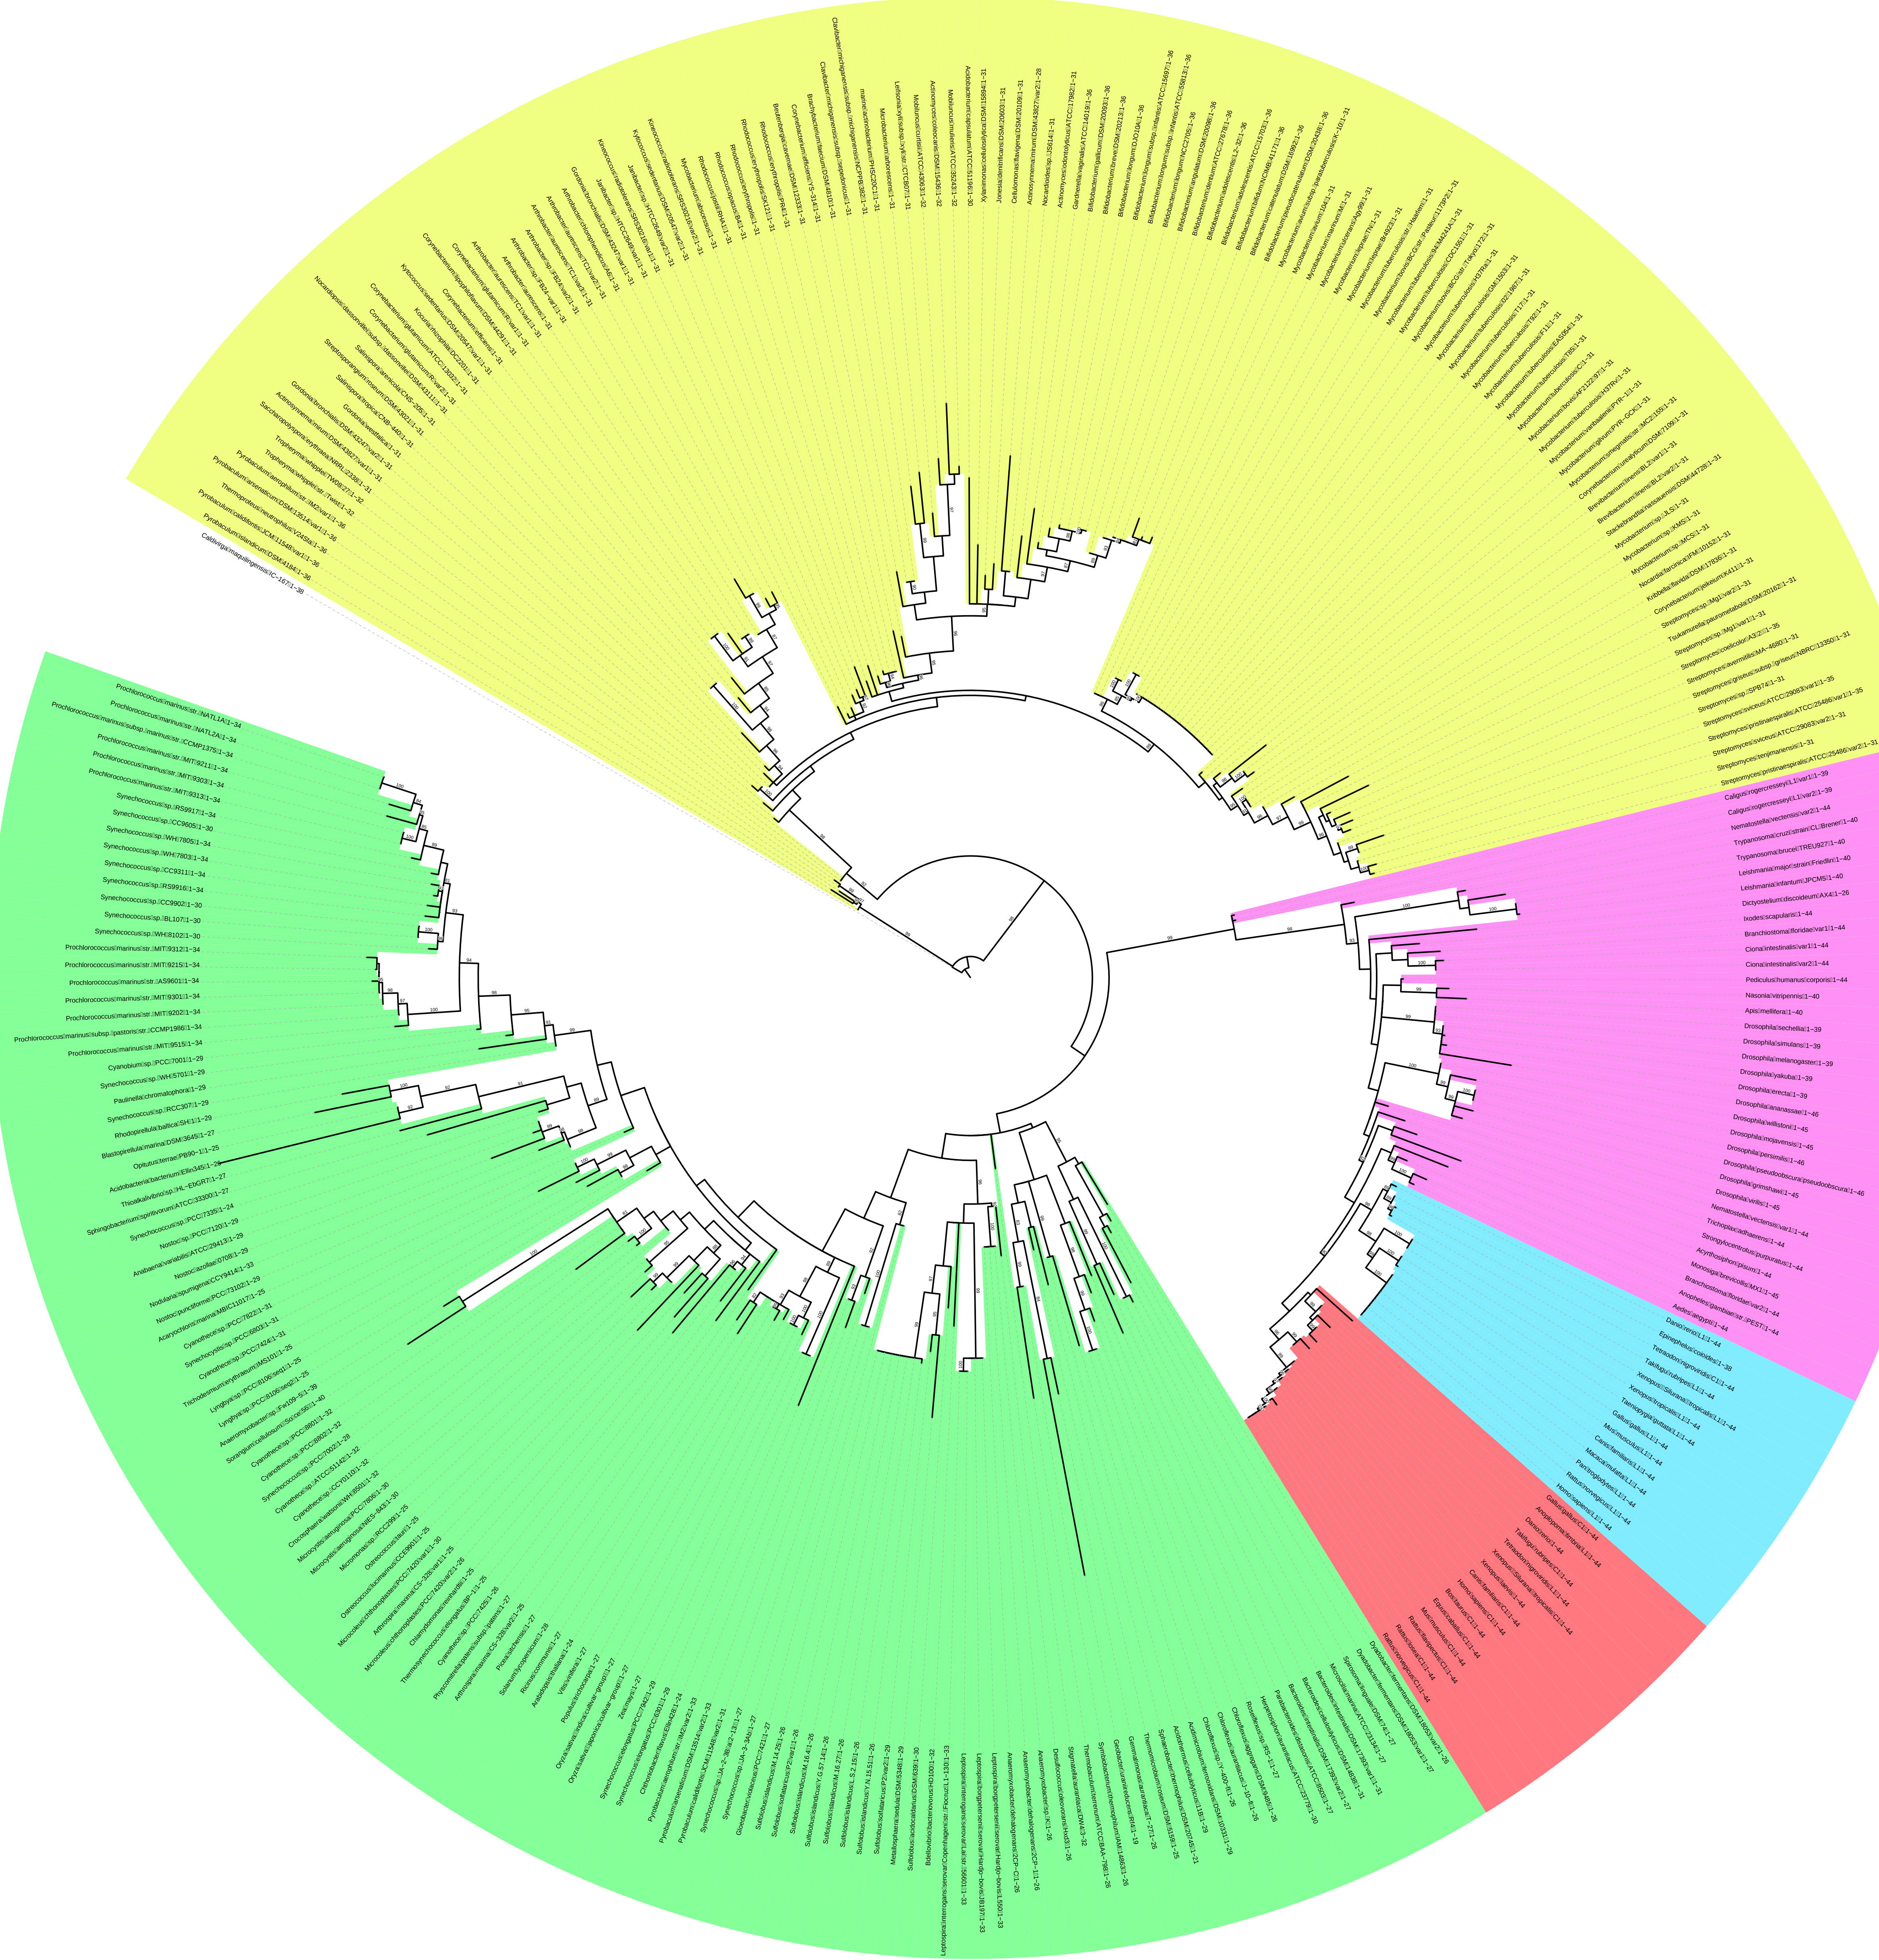

Supplement: s1 [file s1]
